# Supplementary material
Source: HighWire-hosted journal article supplement (https://erj.ersjournals.com/content/54/4/1950843)
Supplement: inline-supplementary-material-1 [file inline-supplementary-material-1.pdf]

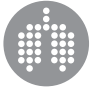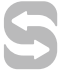

SHAREABLE PDF

**“Balloon pulmonary angioplasty for the treatment of chronic thromboembolic pulmonary hypertension: is Europe behind?” Irene M. Lang and Hiromi Matsubara. *Eur Respir J* 2019; 53: 1900843.**

The above-mentioned editorial has been corrected and republished online; the amendments have been discussed in the correspondence articles published in this issue of the *European Respiratory Journal* [1, 2]. The sentence that originally read:

Copyright ©ERS 2019
